# Supplementary material for: A Hidden Transhydrogen Activity of a FMN-Bound Diaphorase under Anaerobic Conditions
Source: PLOS journal article supplement (doi:10.1371/journal.pone.0154865), 2016-05-04
Supplement: S12 (10.1371/journal.pone.0154865.s012) [file journal.pone.0154865.s012]

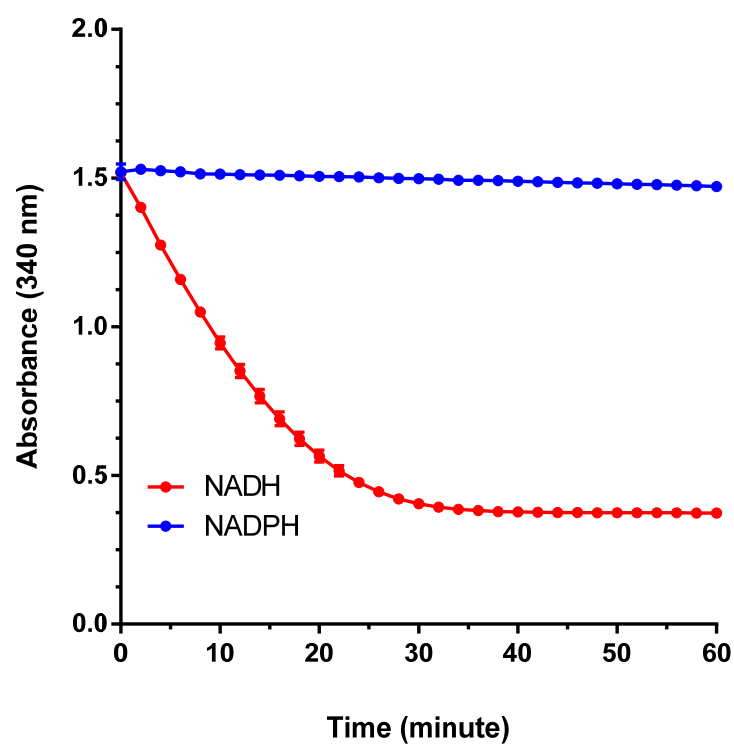

**S12 Fig.** Raw activity curves for comparing the activity of MDH for NADH and NADPH. Running conditions: 20 nM MDH was added to the substrate solution of 1 mM NAD(P)H and 1 mM oxaloacetate at room temperature in pH 7.4, 1×TBS buffer. Error bars were generated as the range of at least three replicates.
